# Supplementary material for: An ARMS-Multiplex PCR Targeting SARS-CoV-2 Omicron Sub-Variants
Source: MDPI journal article supplement (doi:10.3390/pathogens12081017), 2023-08-06
Supplement: s1 [file s1]

| Characteristic SNPs<br>within sub-variant<br>group | SNP POSITION ACCORDING TO WUHAN SEQUENCE (NC_045512.2) |      |       |       |       |
|----------------------------------------------------|--------------------------------------------------------|------|-------|-------|-------|
|                                                    | BA.1                                                   | BA.2 | BA.3  | BA.4  | BA.5  |
| C -> T                                             | -                                                      | -    | 832   | -     | -     |
| A -> G                                             | 2832                                                   | -    | -     | -     | -     |
| G -> A                                             | 8393                                                   | -    | -     | -     | -     |
| C -> T                                             | -                                                      | 9866 | -     | -     | -     |
| C -> T                                             | -                                                      | -    | 11235 | -     | -     |
| A -> G                                             | 11537                                                  | -    | -     | -     | -     |
| T -> C                                             | 13195                                                  | -    | -     | -     | -     |
| C -> T                                             | 15240                                                  | -    | -     | -     | -     |
| T -> G                                             | 22195                                                  | -    | -     | -     | -     |
| T -> G                                             | 22197                                                  | -    | -     | -     | -     |
| A -> C                                             | 22198                                                  | -    | -     | -     | -     |
| C -> A                                             | 22202                                                  | -    | -     | -     | -     |
| T -> C                                             | 22204                                                  | -    | -     | -     | -     |
| T -> C                                             | 22672                                                  | -    | -     | -     | -     |
| G -> A                                             | 23048                                                  | -    | -     | -     | -     |
| C -> A                                             | 23202                                                  | -    | -     | -     | -     |
| C -> A                                             | 24130                                                  | -    | -     | -     | -     |
| C -> T                                             | 24503                                                  | -    | -     | -     | -     |
| G -> A                                             | -                                                      | -    | -     | -     | 26529 |
| G -> T                                             | -                                                      | -    | -     | 27788 | -     |
| C -> T                                             | -                                                      | -    | -     | -     | 27889 |
| C -> T                                             | -                                                      | -    | 29311 | -     | -     |
